# Supplementary material
Source: publisher figshare collection journal article supplement (https://gsapubs.figshare.com/ndownloader/files/22758923)
Supplement: Supplementary file 1 [file 22758923]

## DATA REPOSITORY ITEM 2009118

### THERMODYNAMIC MODELLING

Abiogenic endmember compositions for Nisyros have been computed from equation (4) considering the following temperature dependencies for  $f_{\text{H}_2\text{O}}$  of 2 m NaCl solutions and  $K_3$ , respectively:

$$\log f_{\text{H}_2\text{O}} = 5.462 - 2047/T \quad (\text{S1})$$

$$\log K_3 = 10.5 - (5150 + 310 \cdot n)/T \quad (\text{S2})$$

where  $T$  is in K and  $n$  the number of carbon atoms in ethane and propane, respectively (Chiodini et al., 2001; Taran and Giggenbach, 2003).

Carbon isotope data for  $\text{CH}_4$  and  $\text{CO}_2$  reflect hydrocarbon formation temperatures of  $340 \pm 10^\circ\text{C}$  (Table 1). At these temperatures, the redox conditions of the bi-phase hydrothermal system can be constrained considering gas concentration data of the fumaroles. For the period from 1990-2002, molar ratios ( $X$ ) of redox pairs  $\text{CO}/\text{CO}_2$ ,  $\text{H}_2/\text{H}_2\text{O}$  and  $\text{CH}_4/\text{CO}_2$  indicate that redox conditions at  $340^\circ\text{C}$  closely correspond to the  $\text{FeO}-\text{FeO}_{1.5}$  buffer (Chiodini and Marini, 1998; Marini and Fiebig, 2005), for which  $\log(X_{\text{H}_2}/X_{\text{H}_2\text{O}})$  is  $-2.82$ , roughly independent of temperature (Giggenbach, 1987).  $X_{\text{CO}}/X_{\text{CO}_2}$  and  $X_{\text{CH}_4}/X_{\text{CO}_2}$  ratios were also measured for the fumaroles sampled in this study and are indistinguishable from values observed for the period 1990-2002 (Table 1S). This agreement indicates that no significant change in redox conditions took place between 1990 and 2007. The  $f_{\text{CO}_2}$  at the temperature of methane formation can be constrained from molar ratios of  $\text{CO}$  and  $\text{H}_2$  using equation S3 (Chiodini & Marini, 1998), along with gas concentration data and methane formation temperatures reported by Fiebig et al. (2007):

$$\log f_{\text{CO}_2} = -2.485 + 2248/T - \log(X_{\text{H}_2}/X_{\text{CO}}) + \log f_{\text{H}_2\text{O}}$$

(S3 )

At Nisyros,  $f_{\text{CO}_2}$  is  $\sim 1\text{bar}$  (Table 1S), such that  $\log f_{\text{CO}_2}$  in equation (4) can be neglected.

## MIXING TRENDS DISPLAYED IN FIGURE 1

Hydrocarbon distribution ratios of C1/C2 and C2/C3 are given through

$$C_i/C_{i+1} = (nC_{i,\text{ab}} + nC_{i,\alpha}) / (nC_{i+1,\text{ab}} + nC_{i+1,\alpha}) \quad (\text{S4})$$

with  $nC_{\text{ab}}$  and  $nC_{\alpha}$  denoting the moles of alkane hydrocarbons with carbon numbers  $i$  and  $i+1$ , predicted by thermodynamics according to equation (4) (ab) and by random breakage or linkage of C-bonds ( $\alpha$ ), respectively. The Schulz-Flory distribution factor  $\alpha$  is defined by

$$\alpha = nC_{i+1,\alpha} / nC_{i,\alpha} \quad (\text{S5})$$

The mole fraction of abiogenic equilibrium alkanes with C-numbers  $i$  and  $i+1$  is represented by  $Y$  according to

$$Y_{i+1/i} = nC_{i+1,\text{ab}} / nC_{i,\text{ab}}$$

$$(\text{S6})$$

Values for  $Y$  can be computed from equation (4). If reaction (5) applies for abiogenic hydrocarbon production, only methane is generated and  $Y$  becomes 0. For a given chain length, molar fractions of hydrocarbons generated through random breakage or linkage ( $X_{\alpha}$ ) or through abiogenic processes ( $X_{\text{a}}$ ) are interlinked through

$$X_{\text{b}} = 1 - X_{\alpha} = nC_{\text{a}} / nC = (1 - nC_{\alpha} / nC) \quad (\text{S7})$$

Considering equation (S4) to (S7), it can be derived for C1/C2 and C2/C3 ratios

$$C1/C2 = 1 / ((1 - X_{\alpha}) * Y_{2/1} + \alpha * X_{\alpha}) \quad (\text{S8})$$

$$C2/C3 = ((1 - X_{\alpha}) * Y_{2/1} + \alpha * X_{\alpha}) / ((1 - X_{\alpha}) * Y_{2/1} * Y_{3/2} + \alpha * \alpha * X_{\alpha}) \quad (\text{S9})$$

46

## TABLE

Table DR1. Molar ratios,  $X$ , of gas components contained in dry gas samples and comparison of  $X_{\text{CH}_4}/X_{\text{CO}_2}$  and  $X_{\text{CO}}/X_{\text{CO}_2}$  ratios obtained in 2007 with those characteristic for the 12 year period (1990-2002; Marini & Fiebig, 2005). Also given are  $\log f_{\text{CO}_2}$  values characteristic for

the Nisyros bi-phase hydrothermal system, which were calculated according to equation S3 and temperatures derived from carbon isotope partitioning between CO<sub>2</sub> and CH<sub>4</sub> (see Table 1).

## REFERENCES CITED

- Chiodini, G., and Marini, L., 1998, Hydrothermal gas equilibria: The H<sub>2</sub>O-H<sub>2</sub>-CO<sub>2</sub>-CO-CH<sub>4</sub> system: *Geochimica et Cosmochimica Acta*, v. 62, p. 2673-2687.
- Chiodini, G., Marini, L., and Russo, M., 2001, Geochemical evidence for the existence of high-temperature hydrothermal brines at Vesuvius volcano, Italy: *Geochimica et Cosmochimica Acta*, v. 65, p. 2129-2147.
- Fiebig, J., Woodland, A.B., Spangenberg, J., and Oschmann, W., 2007, Natural evidence for rapid abiogenic hydrothermal generation of CH<sub>4</sub>: *Geochimica et Cosmochimica Acta*, v. 71, p. 3028-3039.
- Giggenbach, W.F., 1987, Redox processes governing the chemistry of fumarolic gas discharges from White Island, New Zealand: *Applied Geochemistry*, v. 2, p. 143-161.
- Marini, L., and Fiebig, J., 2005, Fluid geochemistry of the magmatic-hydrothermal system of Nisyros (Aegean arc, Greece), in Hunziker, J.C., and Marini, L., eds., *The geology, geochemistry and evolution of Nisyros volcano (Greece); implications for the volcanic hazards: Memoires de Geologie (Lausanne)*, v. 44, p. 121-163.
- Taran, Y.A., and Giggenbach, W.F., 2003, Geochemistry of light hydrocarbons in subduction-related volcanic and hydrothermal fluids: *Society of Economic Geologists, special Publication*, v. 10, p. 61-74.

| <b>Sample</b>           | <b>X(CO<sub>2</sub>)</b> | <b>X(CH<sub>4</sub>)</b> | <b>X(CO)</b> | <b>X(H<sub>2</sub>)</b> | <b>log(CO/CO<sub>2</sub>)</b> | <b>log(CO/CO<sub>2</sub>)<sub>12yr</sub></b> | <b>log(CH<sub>4</sub>/CO<sub>2</sub>)</b> | <b>log(CH<sub>4</sub>/CO<sub>2</sub>)<sub>12yr</sub></b> | <b>logf(CO<sub>2</sub>)</b> |
|-------------------------|--------------------------|--------------------------|--------------|-------------------------|-------------------------------|----------------------------------------------|-------------------------------------------|----------------------------------------------------------|-----------------------------|
| Polybotes Mikros (PP9S) | 743300                   | 1759                     | 9.0          | 16000                   | -4.9                          | -4.8 to -5.5                                 | -2.6                                      | -2.5 to -3.0                                             | 0.0                         |
| Stefanos (S4)           | 791500                   | 4400                     | 2.2          | 6200                    | -5.6                          | -5.4 to -6.1                                 | -2.3                                      | -2.1 to -2.6                                             | -0.1                        |
| Phlegeton (A)           | 809300                   | 805                      | 2.1          | 9230                    | -5.6                          | -5.3 to -6.0                                 | -3.0                                      | -2.4 to -3.2                                             | -0.3                        |
